# Supplementary material
Source: publisher figshare collection journal article supplement (https://plos.figshare.com/articles/dataset/_/5550580)
Supplement: Supplementary file 1 [file 1]

Archive with 9 entries (9 files):
- pgen.1007085.s001.tif
- pgen.1007085.s002.tif
- pgen.1007085.s003.tif
- pgen.1007085.s004.tif
- pgen.1007085.s005.tif
- pgen.1007085.s006.docx
- pgen.1007085.s007.docx
- pgen.1007085.s008.docx
- pgen.1007085.s009.pdf
