# Supplementary material
Source: publisher figshare collection journal article supplement (https://plos.figshare.com/articles/dataset/_/5550580)
Supplement: Supplementary file 1 [file 1 › pgen.1007085.s006.docx]

**S1 Table: Plasmids**

| **Name** | **Description** | **Reference** |
| --- | --- | --- |
| 6686 | pRS306-PSUP35SUP35 | DiSalvo *et al.* 2011 |
| SB467 | pRS306-PSUP35SUP35(G58D) | DiSalvo *et al.* 2011 |
| SB468 | pRS306-PADHSUP35(G58D) | This study |
| SB645 | pRS304-PSUP35SUP35(G58D) | DiSalvo *et al.* 2011 |
| SB657 | pRS306-Ptet02SUP35 | DiSalvo *et al.* 2011 |
| SB658 | pRS306-Ptet02SUP35(G58D) | DiSalvo *et al.* 2011 |
